# Supplementary material
Source: Royal Society of Chemistry journal article supplement (doi:10.1039/d6ay00618c)
Supplement: d6ay00618c1.pdf [file d6ay00618c1.pdf]

### Supporting Information

## Hydrothermal Synthesis of Co Substituted MnWO<sub>4</sub> Nanostructure for Fluorometric Sensing and Determination of 4-Nitrophenol

Imran Hasan\*, Fahad Alharthi\*

\*Department of Chemistry, College of Science, King Saud University, P.O. Box 2455, Riyadh,  
Saudi Arabia 11451

Email: [iabdulateef@ksu.edu.sa](mailto:iabdulateef@ksu.edu.sa)

Email: [fharthi@ksu.edu.sa](mailto:fharthi@ksu.edu.sa)

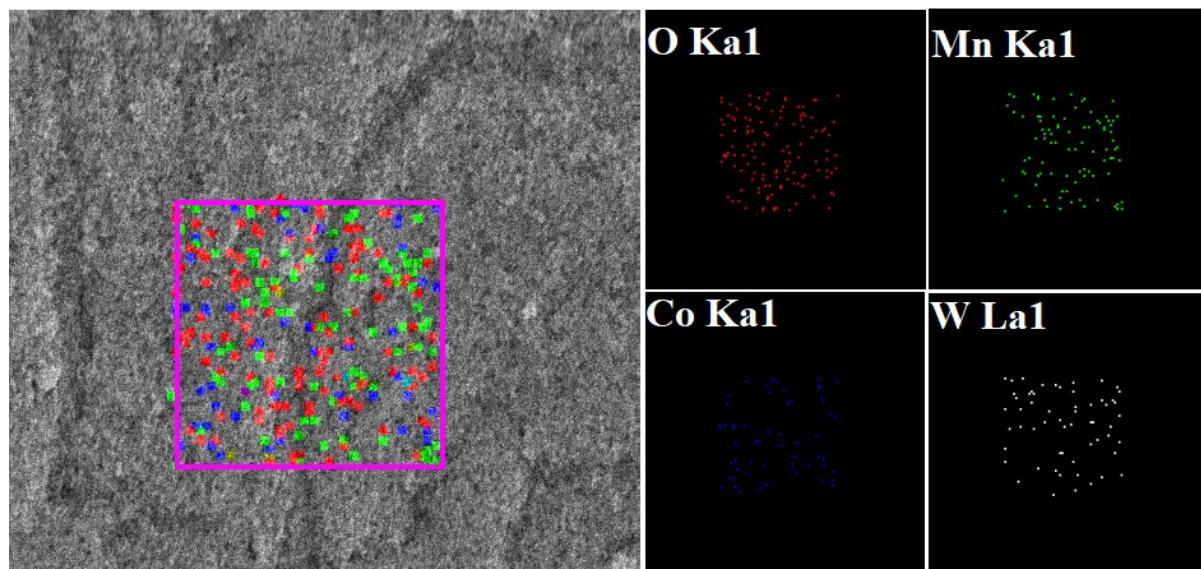

**Figure S1.** Selected area SEM image of Co-MnWO<sub>4</sub> NPs showing the mapping of O, Mn, Co and W

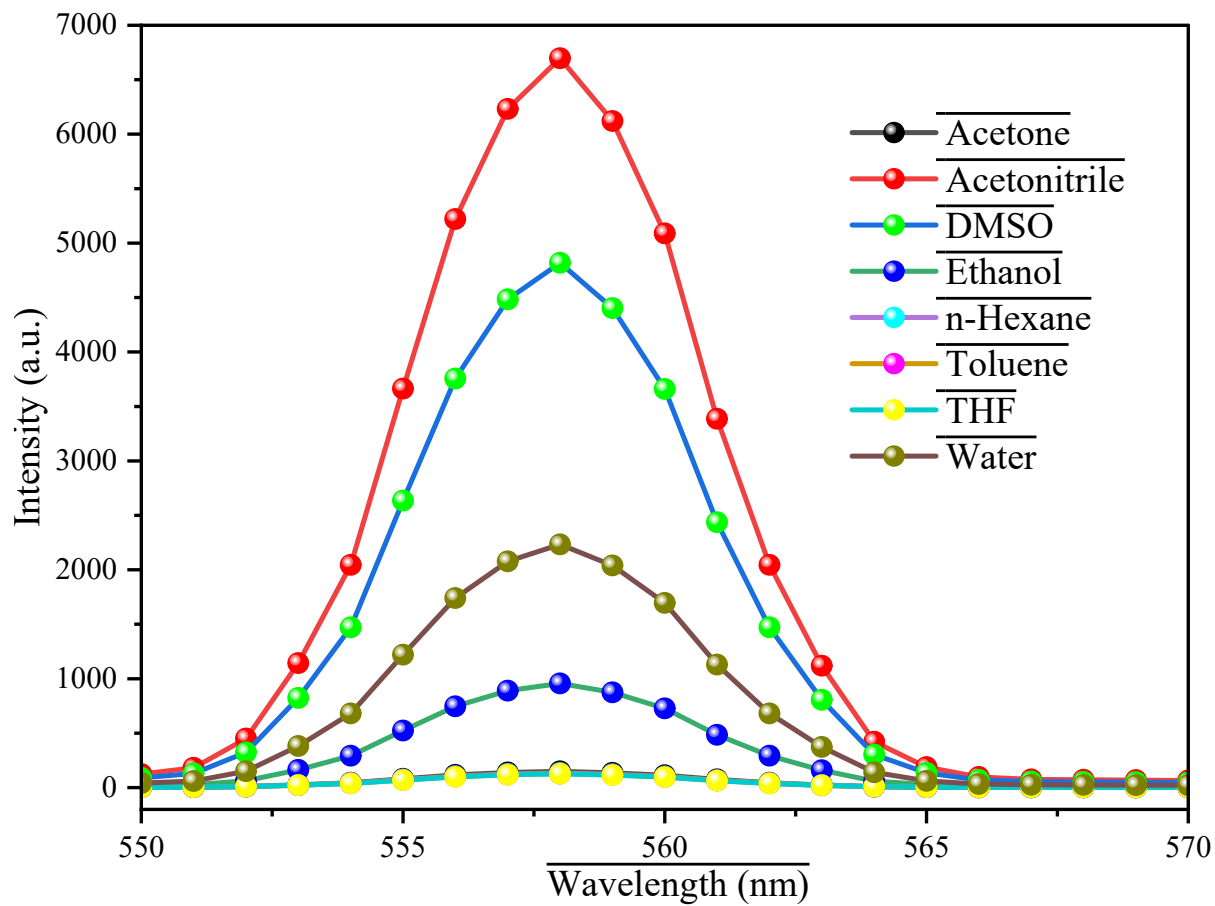

**Figure S2.** Solvent selection with whom Co-MnWO<sub>4</sub> exhibit maximum fluorescence intensity

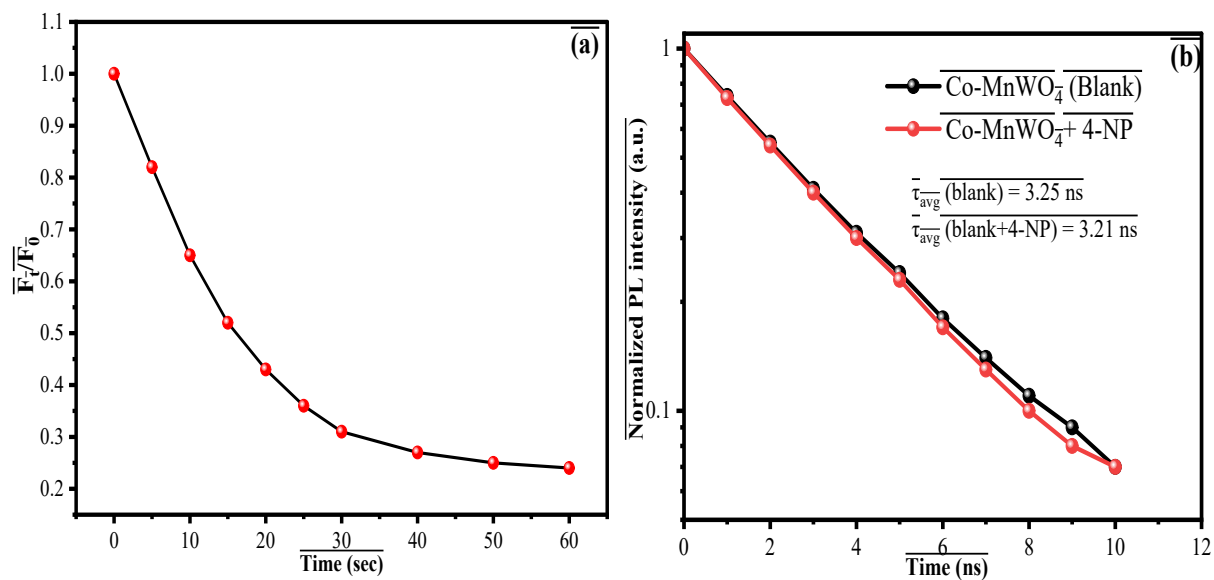

**Figure S3.** (a) Response time curve of Co-MnWO<sub>4</sub> probe towards 4-NP and (b) TRPL decay curves of the Co-MnWO<sub>4</sub> probe in absence and presence of 4-NP

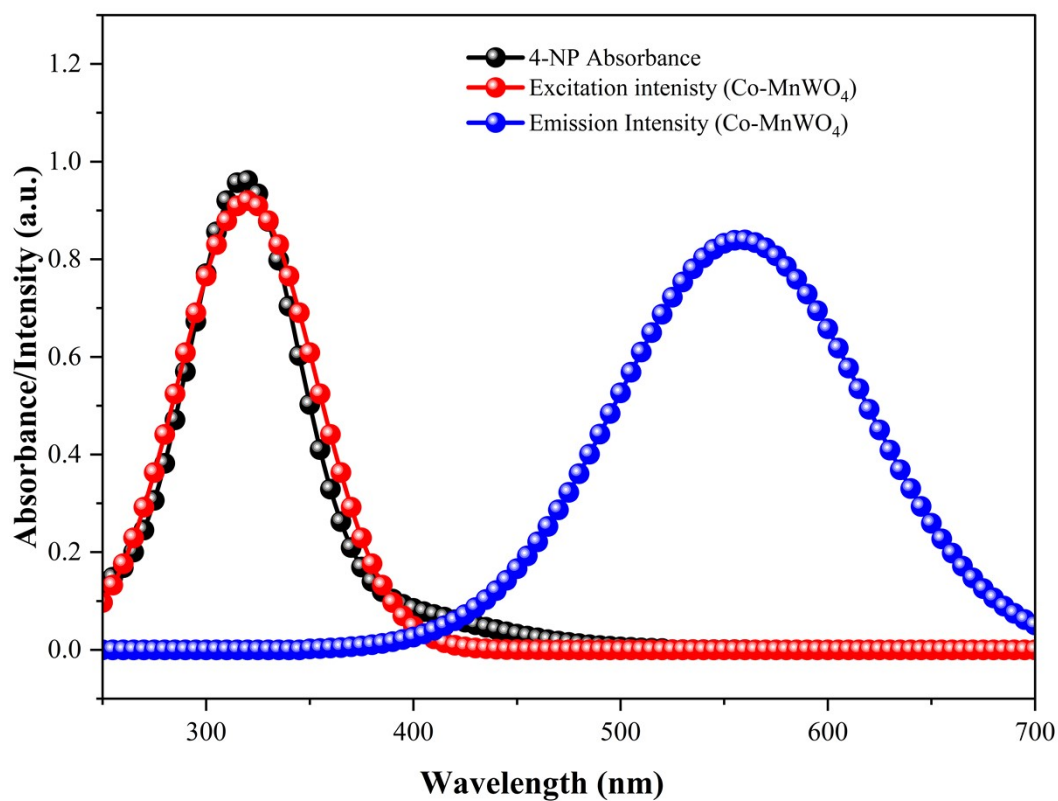

**Figure S4.** Combined UV absorption spectra of 4-NP and fluorescence excitation and emission spectra of Co-MnWO<sub>4</sub> nanostructure probe

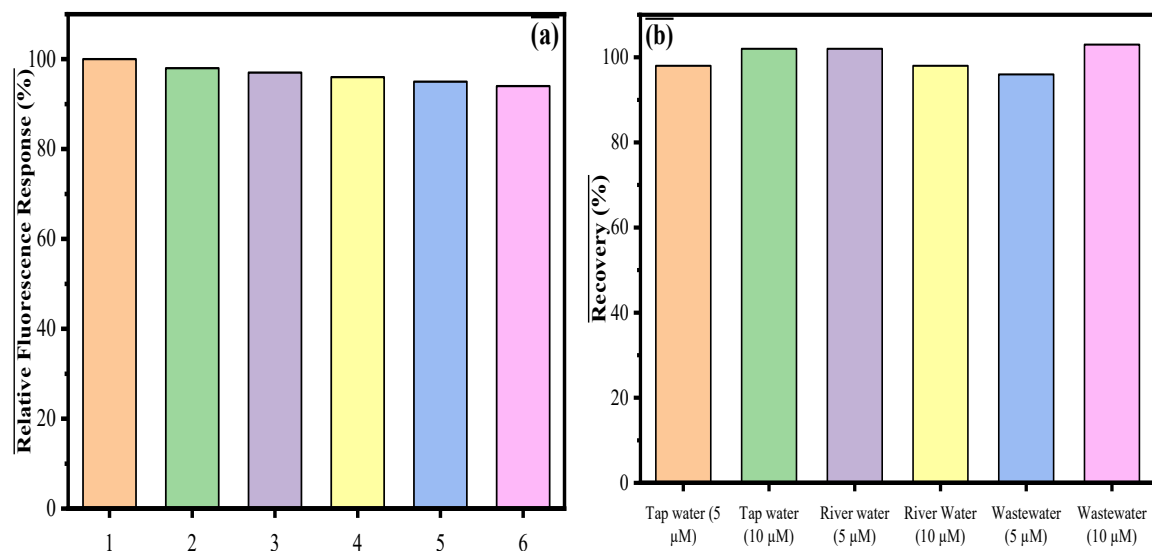

**Figure S5.** (a) Reusability and cycling ability of Co-MnWO<sub>4</sub> probe towards 4-NP detection and (b) Real sample recovery study of 4-NP detection using Co-MnWO<sub>4</sub> fluorescence probe

**Table S1.** Sample recovery studies for Co-MnWO<sub>4</sub> towards 4-NP sensing using various water matrix

| Sample      | Added (μM) | Found (μM) | Recovery (%) | RSD (%) |
|-------------|------------|------------|--------------|---------|
| Tab water   | 5          | 4.9        | 98           | 2.1     |
| Tab water   | 10         | 10.2       | 102          | 1.8     |
| River water | 5          | 5.1        | 102          | 2.3     |
| River water | 10         | 9.8        | 98           | 2       |
| Wastewater  | 5          | 4.8        | 96           | 2.5     |
| Wastewater  | 10         | 10.3       | 103          | 2.2     |
